# Supplementary material for: ELISA-Based Assay for Studying Major and Minor Group Rhinovirus–Receptor Interactions
Source: MDPI journal article supplement (doi:10.3390/vaccines8020315), 2020-06-18
Supplement: s1 [file s1]

| Sample ID | Registered sequence                                       | Total score | Query Cover <sup>1</sup> (%) | E value <sup>2</sup> | Identity (%) | Accession  |
|-----------|-----------------------------------------------------------|-------------|------------------------------|----------------------|--------------|------------|
| RV2       | Human rhinovirus 2, complete sequence                     | 854         | 100                          | 0.0                  | 100          | X02316.1   |
| RV8       | Human rhinovirus 8 strain, ATCC VR-1118 complete genome   | 785         | 100                          | 0.0                  | 100          | FJ445113.1 |
| RV14      | Human rhinovirus type 14 (HRV14), complete genome         | 821         | 99                           | 0.0                  | 100          | K02121.1   |
| RV16      | Human rhinovirus type 16, polyprotein gene, complete CDS  | 854         | 100                          | 0.0                  | 99.78        | L24917.1   |
| RV18      | Human rhinovirus 18 strain, polyprotein gene, partial     | 717         | 75                           | 0.0                  | 100          | AY016407.1 |
| RV25      | Human rhinovirus 25 strain, ATCC VR-1135, complete genome | 859         | 100                          | 0.0                  | 100          | FJ445123.1 |
| RV29      | Human rhinovirus 29 strain, ATCC VR-1139, complete genome | 795         | 100                          | 0.0                  | 100          | FJ445125.1 |
| RV44      | Human rhinovirus 44, complete genome                      | 865         | 100                          | 0.0                  | 100          | DQ473499.1 |
| RV54      | Human rhinovirus 54 strain, ATCC VR-1164, complete genome | 822         | 100                          | 0.0                  | 100          | FJ445138.1 |
| RV72      | Human rhinovirus 72 strain, ATCC VR-1182, complete genome | 822         | 100                          | 0.0                  | 100          | FJ445153.1 |
| RV89      | Human rhinovirus 89 strain, ATCC VR-1199, complete genome | 813         | 100                          | 0.0                  | 100          | FJ445184.1 |

<sup>1</sup>Query cover – an overlap between a searched and a reference sequence, <sup>2</sup>E value – a random background noise.
